# Supplementary material for: UV-fs-LA-ICP-MS Analysis of CO2-Rich Fluid Inclusions in a Frozen State: Example from the Dahu Au-Mo Deposit, Xiaoqinling Region, Central China
Source: Hindawi journal article supplement (doi:10.1155/2018/3692180), 2018-01-01
Supplement: f1 [file 3692180.f1.pdf]

Table A1

Element concentrations (ppm) in individual solid-bearing fluid inclusions from Dahu stage I quartz.

| Fluid inclusion |      |      |       |       |       |       |       |       |        |       |    |       |        |        |       |    |       |        |        |        |
|-----------------|------|------|-------|-------|-------|-------|-------|-------|--------|-------|----|-------|--------|--------|-------|----|-------|--------|--------|--------|
| number          | Li   | B    | Na    | Al    | K     | Ca    | Mn    | Fe    | Cu     | Zn    | Rb | Sr    | Mo     | Ag     | Te    | Cs | Ba    | Au     | Pb     | Bi     |
| LS-540-3C-L8    | 267  | 142  | 35885 | <0.7  | 10024 | <51   | <0.7  | <7    | 14881  | <0.3  | 84 | 392   | <0.04  | 36     | <0.2  | 17 | 29    | <0.08  | <0.01  | <0.006 |
| LS-540-3C-L1    | 166  | 207  | 39500 | <0.5  | 10499 | 927   | 38    | <5    | <0.2   | <0.2  | 59 | <0.04 | <0.01  | <0.05  | <0.1  | 19 | <0.04 | <0.05  | <0.008 | <0.004 |
| LS-540-3C-L16   | 141  | 234  | 33566 | <0.7  | 7075  | 30551 | 37    | 17331 | 362760 | 84    | 35 | 2864  | <0.04  | 516    | <0.2  | 5  | 3     | <0.08  | 5927   | <0.004 |
| LS-540-3C-L23   | <0.3 | 149  | 39323 | <0.1  | 12272 | 41690 | 106   | <2    | 894820 | <0.06 | 77 | 2612  | 281    | 678    | <0.04 | 15 | <0.01 | <0.02  | 66     | <0.001 |
| DH-505-8-L61    | <4   | 132  | 15981 | <2    | 6141  | <134  | 20    | <20   | 4079   | <0.7  | 42 | 14    | <0.1   | 18     | <0.4  | 13 | 3     | <0.2   | 2      | <0.02  |
| DH-505-8-L58    | 29   | 202  | 16332 | 22    | 5543  | <413  | 27    | <64   | 79659  | <2    | 73 | 8     | <0.4   | 321    | <1.8  | 17 | <0.5  | <0.7   | 19     | <0.05  |
| DH-505-8-L57    | 50   | 169  | 20318 | <2    | 6926  | <133  | <2    | <21   | 15562  | 4     | 73 | 16    | 2      | 108    | <0.6  | 19 | 1     | <0.2   | 18     | <0.02  |
| DH-505-8-L68    | 23   | 182  | 17413 | 4151  | 5846  | <267  | 96    | 216   | 433473 | 7     | 75 | 14    | 5      | 2073   | 2     | 18 | <0.3  | <0.4   | 92     | <0.03  |
| DH-505-8-L62    | <2   | 160  | 17661 | <0.8  | 5625  | 1032  | 16    | <10   | 40     | <0.4  | 53 | 11    | <0.07  | <0.08  | <0.3  | 14 | 1     | <0.1   | 1      | <0.008 |
| DH-505-8-LA5    | 56   | 206  | 20210 | 30    | 6440  | 1808  | <0.8  | 239   | 380026 | 18    | 61 | 7     | 76     | 1352   | <0.2  | 21 | 4     | <0.09  | 79     | 0.05   |
| DH-505-8-L64    | 151  | 88   | 19476 | 40    | 6084  | <20   | <0.3  | <3    | 73142  | <0.1  | 63 | 88    | 3      | 512    | <0.07 | 12 | 28    | <0.03  | 14     | <0.002 |
| DH-505-8-L71    | 29   | 121  | 20034 | <0.2  | 6741  | 648   | 13    | <2    | <0.1   | <0.08 | 37 | 10    | <0.01  | <0.08  | <0.06 | 14 | <0.02 | <0.03  | <0.004 | <0.002 |
| DH-505-8-L73    | <0.8 | <0.4 | 19854 | <0.4  | 7047  | <31   | <0.4  | <5    | 455159 | <0.2  | 47 | 5     | <0.03  | 2273   | <0.1  | 13 | <0.02 | <0.05  | <0.007 | <0.005 |
| DH-505-8-L75    | 28   | 121  | 20563 | <0.2  | 5840  | 4015  | 29    | <3    | 3321   | <0.1  | 43 | 704   | <0.02  | 30     | <0.06 | 15 | <0.02 | <0.03  | 1      | <0.002 |
| DH-505-8-LA3    | <14  | 173  | 14667 | NM    | 8374  | NM    | <8    | <92   | 333024 | <7    | 34 | 9     | <0.8   | 1166   | <5    | 10 | <1    | <1     | 28     | <0.1   |
| DH-505-8-LA1    | <12  | 169  | 11976 | NM    | 10543 | NM    | <7    | <79   | 123608 | <6    | 37 | 26    | <0.6   | 408    | <4    | 9  | <1    | <0.9   | 14     | <0.1   |
| DH-505-8-LA2    | 29   | 160  | 14957 | NM    | 10224 | NM    | 40    | <71   | 117504 | <5    | 33 | 9     | <0.6   | 314    | <4    | 11 | 3     | <0.8   | 5      | <0.1   |
| LS-540-3B-L4    | 1150 | 86   | 19838 | <0.1  | 13040 | 749   | <0.3  | <3    | 38368  | <0.09 | 37 | 207   | <0.02  | 1      | <0.09 | 7  | <0.01 | <0.03  | <0.009 | <0.005 |
| LS-540-3B-L2    | 486  | 70   | 18939 | <0.1  | 11547 | <6    | <0.3  | <3    | 27822  | <0.08 | 36 | 88    | <0.02  | 2      | <0.07 | 7  | 5     | <0.03  | <0.009 | <0.004 |
| LS-540-3B-L15   | 343  | 121  | 19563 | <0.08 | 10485 | <6    | <0.3  | <2    | 86596  | <0.07 | 54 | 119   | 2      | <0.02  | <0.06 | 16 | <0.01 | <0.03  | <0.007 | <0.003 |
| LS-540-3B-L12   | <2   | 181  | 21841 | <0.1  | 9915  | <11   | <0.5  | <4    | 2237   | <0.1  | 58 | 29    | <0.03  | <0.04  | <0.1  | 18 | <0.01 | <0.05  | <0.01  | <0.005 |
| LS-540-3B-L13   | 483  | 151  | 24380 | 51    | 12396 | <15   | 32    | <6    | 243769 | <0.2  | 68 | 207   | 13     | <0.05  | <0.1  | 18 | 16    | <0.07  | <0.02  | <0.007 |
| LS-540-3B-L17   | 49   | 126  | 19713 | 406   | 12505 | <2    | <0.09 | 66    | 938    | <0.02 | 74 | 24    | <0.005 | <0.006 | <0.02 | 16 | 1     | <0.008 | <0.002 | <0.001 |
